# Supplementary material
Source: Springer Nature journal article supplement (https://www.springermedizin.de/resource/supplementary/12890_2013_653_MOESM6_ESM.pdf/9505590)

- control (N=6)
- 10% FBS (N=6)
- ACh (N=6)
- ACh+PD98059 (N=6)
- CCh+LY294002 (N=5)
- CCh (N=6)
- CCh+PD98059 (N=6)
- CCh+LY294002 (N=5)

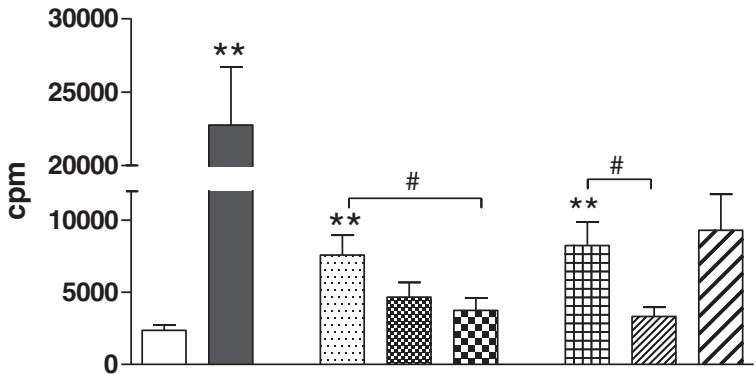

Supplement: MOESM6 [file 9505590]
